# Supplementary material
Source: publisher site journal article supplement (https://www.dovepress.com/article/384085)
Supplement: Supplementary file 1 [file get_supplementary_file.php]

**Development of controlled-release nanoniosomes for improved delivery and anticancer activity of letrozole for breast cancer treatment**

Saeedeh Ahmadia, Mahmoud Serajb**,** Mohsen Chiania, *, Seyedayin Hosseinic,Saba Bazzazand,Iman Akbarzadeha,Samaneh Saffard, Ebrahim Mostafavie, f, *

aDepartment of Nano Biotechnology, New Technology Research Group, Pasteur Institute of Iran, Tehran, Iran

bIntegrative Research Laboratory, Islamic Azad University of Medical Sciences, Tehran, Iran

c School of Medicine, Shahid Beheshti University of Medical Sciences, Tehran, Iran

dCore Facility Lab, Pasteur Institute of Iran, Tehran, Iran

eStanford Cardiovascular Institute, Stanford University School of Medicine, Stanford, CA 94305, USA

fDepartment of Medicine, Stanford University School of Medicine, Stanford, CA 94305, USA

***Correspondence:** ebimsv@stanford.edu (E. Mostafavi);[chiani@pasteur.ac.ir](mailto:chiani@pasteur.ac.ir) (M. Chiani)


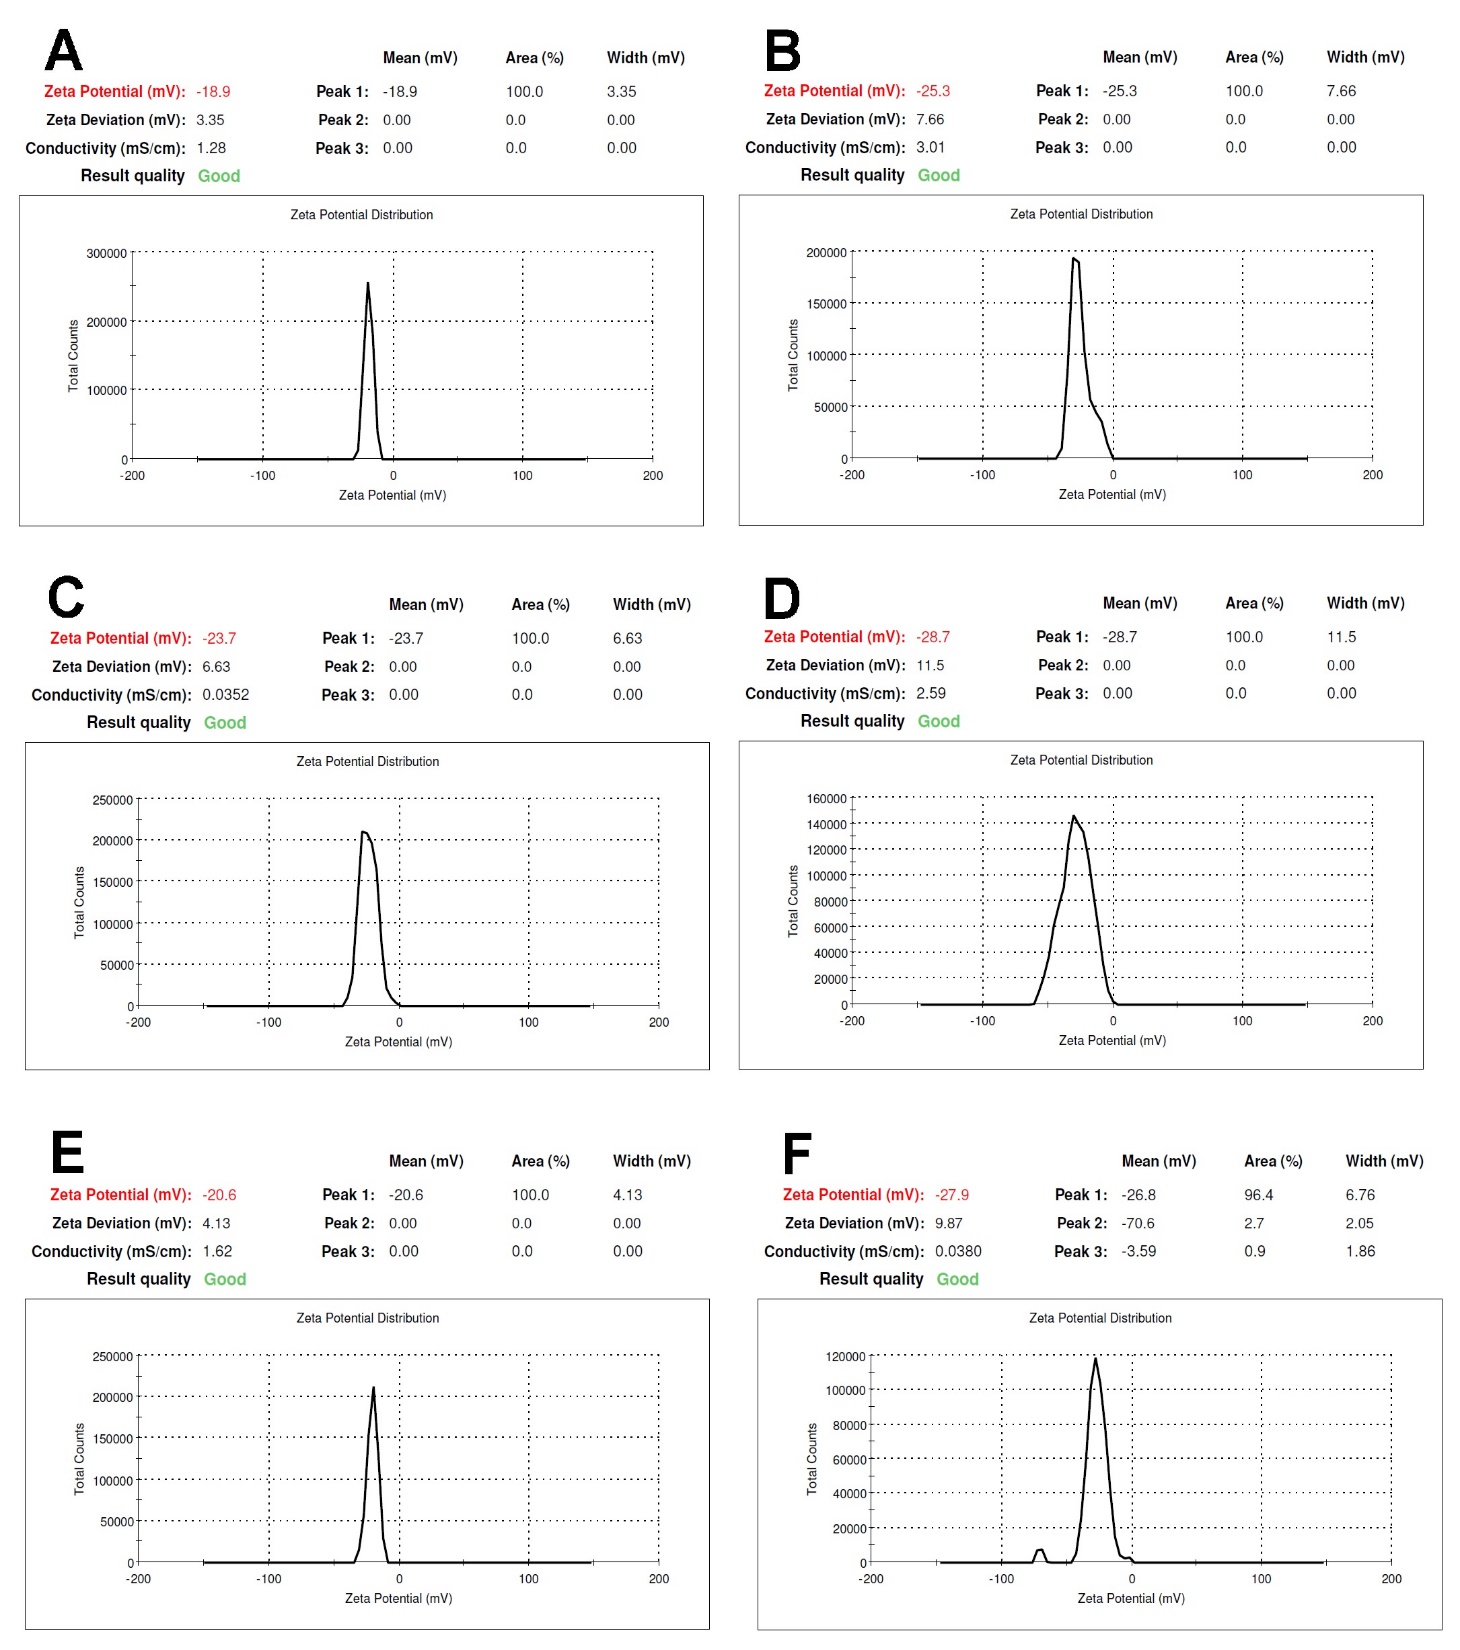


**Figure S1.** A-F) demonstrated the Zeta potential of L1 (A), L1B (B), L2 (C), L2B (D), L3 (E), and L3B (F).


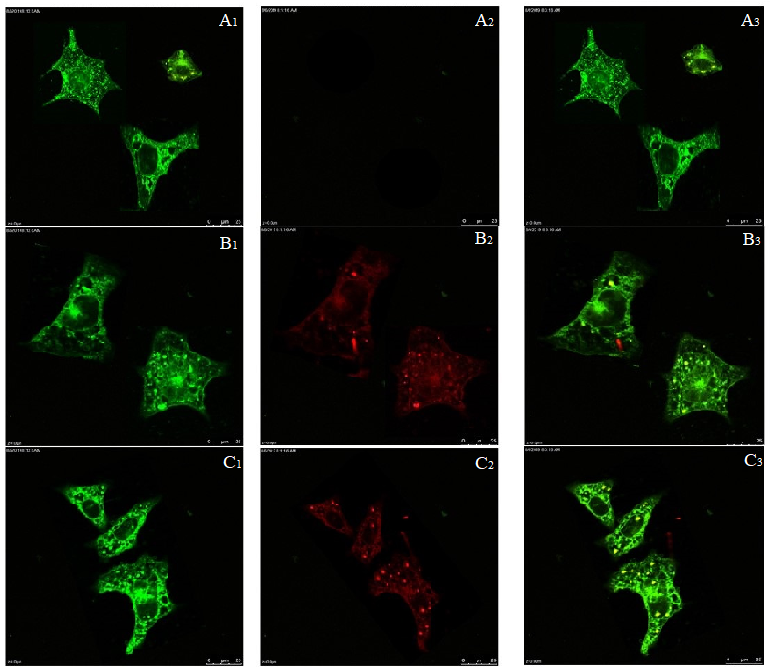


**Figure S2.** Cell uptake of niosomes was investigated by confocal microscopy. MDA-MB-231 cells stained with coumarin 6 (green points in A1, B1 and C1), MDA-MB-231 cells treated with Nile-red loaded niosomes (red points in A2, B2 and C1), and Localization of Nile red loaded niosome into MDA-MB-231 cells (yellow points in A3, B3 and C3).
